# Supplementary material for: Vegetable Oil Derived Solvent, and Catalyst Free “Click Chemistry” Thermoplastic Polytriazoles
Source: Hindawi journal article supplement (doi:10.1155/2014/792901), 2014-01-01
Supplement: f1 [file 792901.f1.pdf]

# Supplementary Information

## Vegetable Oil-Derived, Solvent and Catalyst Free 'Click Chemistry' Thermoplastic Polytriazoles

*Michael C. Floros<sup>†</sup>, Alcides Lopes Leão<sup>‡</sup>, and Suresh S. Narine<sup>†\*</sup>*

<sup>†</sup> Trent Centre for Biomaterials Research, Departments of Physics & Astronomy and Chemistry, Trent University, Peterborough, Canada.

<sup>‡</sup> College of Agricultural Sciences, São Paulo State University, (UNESP), Botucatu, Brazil.

\*Trent University, Peterborough, Canada. Fax: 70 5750 2786; Tel: 70 5748 1011; E-mail: [sureshnarine@trentu.ca](mailto:sureshnarine@trentu.ca)

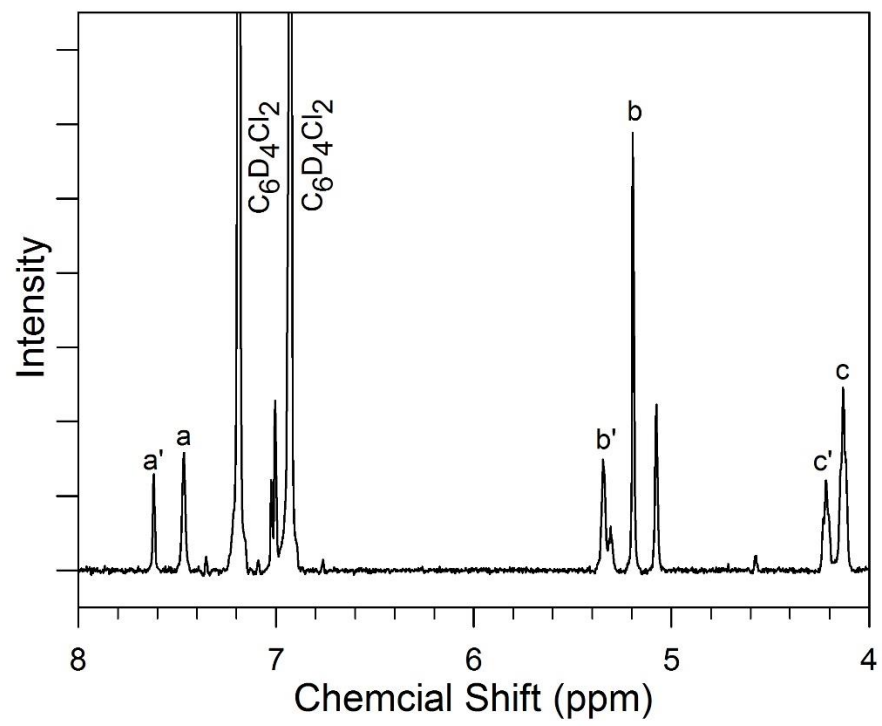

**Figure S1.** Zoom on Figure 1.
